21. Finger S, Koehler PJ, Jagella C: The Monakow concept of diaschisis: Origins and perspectives. *Arch Neurol* 2004; 61:283–8
22. Segtnan EA, Grupe P, Jarden JO, Gerke O, Ivanidze J, Christlieb SB, Constantinescu C, Pedersen JE, Houshmand S, Hess S, Zarei M, Gjedde A, Alavi A, Høilund-Carlsen PF: Prognostic implications of total hemispheric glucose metabolism ratio in cerebocerebellar diaschisis. *J Nucl Med* 2017; 58:768–73
23. Kamble RB, Venkataramana NK, Shetty RV, Naik AL, Rao S, Diwakar N: Cerebral high grade glioma with crossed cerebellar metastases. A report of three cases. *Neuroradiol J* 2010; 23:429–32
24. Newberg AB, Alavi A, Alavi J: Contralateral cortical diaschisis in a patient with cerebellar astrocytoma after radiation therapy. *Clin Nucl Med* 2000; 25:431–3
25. Ostrom QT, Gittleman H, Fulop J, Liu M, Blanda R, Kromer C, Wolinsky Y, Kruchko C, Barnholtz-Sloan JS: CBTRUS Statistical Report: primary brain and central nervous system tumors diagnosed in the United States in 2008–2012. *Neuro Oncol* 2015; 17 Suppl 4: iv1–iv62
26. Lin N, Vutskits L, Bebawy JF, Gelb AW: Perspectives on dexmedetomidine use for neurosurgical patients. *J Neurosurg Anesthesiol* 2018, DOI:10.1097/ANA.0000000000000554

## ANESTHESIOLOGY REFLECTIONS FROM THE WOOD LIBRARY-MUSEUM

### Airs and Affairs: Adulteration and Adultery around Dr. Oliver Walcott Hall

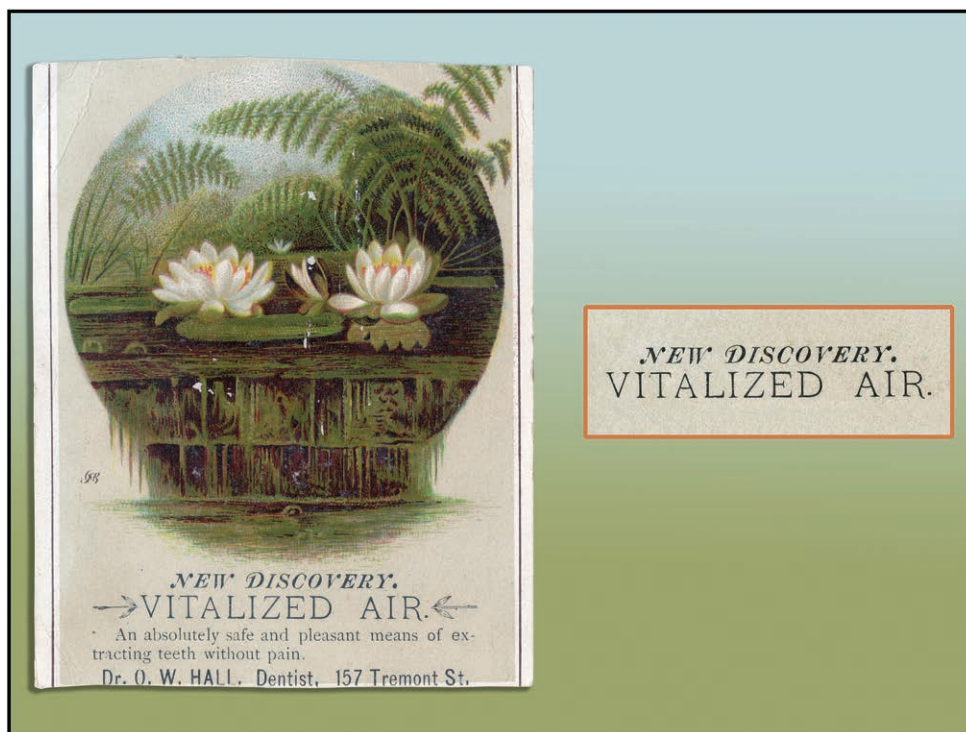

After earning his D.D.S. in 1879 from the Pennsylvania College of Dental Surgery, Oliver Walcott Hall made anesthesia history on Boston's Tremont Street as an early advocate of "Vitalized Air" (above), which, in this case, was nitrous oxide adulterated with alcohol and chloroform. After his wife had passed away, a stunned Dr. Hall stumbled across evidence of adultery and made legal history by filing an "alienation of affection" case against his late wife's lover. (Copyright © the American Society of Anesthesiologists' Wood Library-Museum of Anesthesiology.)

*George S. Bause, M.D., M.P.H., Honorary Curator and Laureate of the History of Anesthesia, Wood Library-Museum of Anesthesiology, Schaumburg, Illinois, and Clinical Associate Professor, Case Western Reserve University, Cleveland, Ohio. UJYC@aol.com.*
